# Supplementary material
Source: Springer Nature journal article supplement (https://www.springermedizin.de/resource/supplementary/13054_2013_2186_MOESM4_ESM.pdf/9712630)

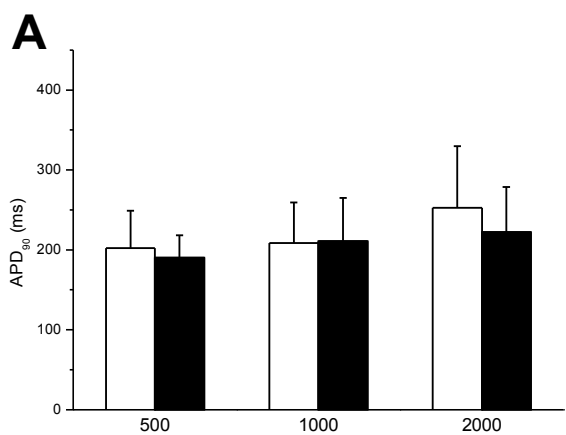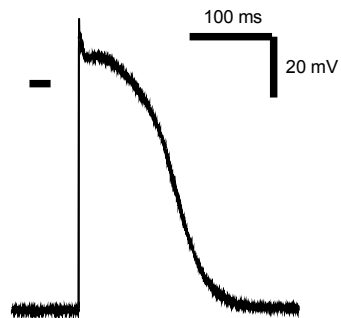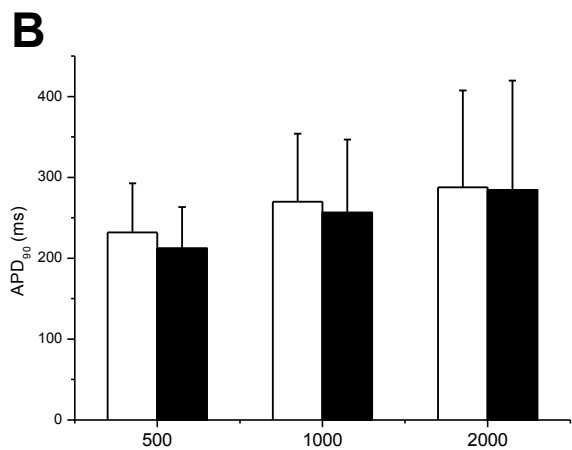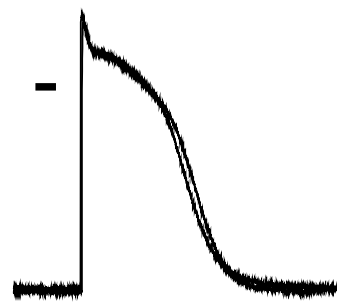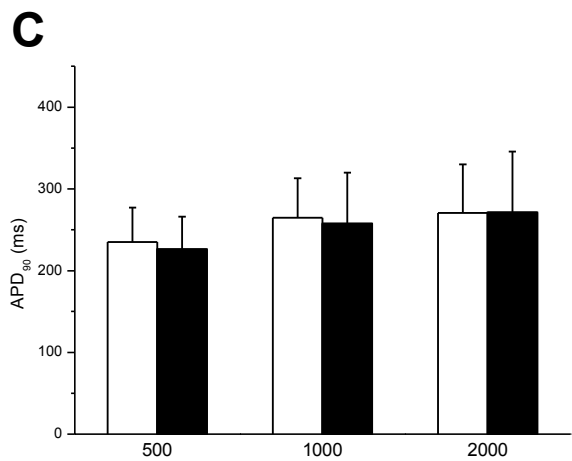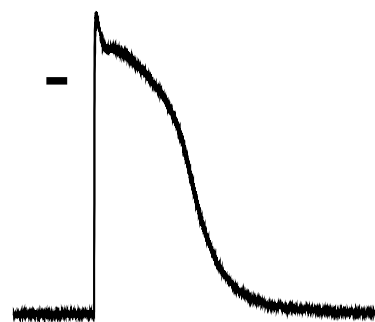

Supplement: MOESM4 [file 9712630]
